## The Neurovascular Basis of Postictal Amnesia

Jordan S. Farrell<sup>1,2#\*</sup>, Roberto Colangeli<sup>2#</sup>, Barna Dudok<sup>1</sup>, Marshal D. Wolff<sup>2</sup>, Sarah L. Nguyen<sup>3</sup>, Clayton T. Dickson<sup>3-5</sup>, Ivan Soltesz<sup>1</sup>, G. Campbell Teskey<sup>2</sup>

1. Department of Neurosurgery, Stanford University, Stanford, CA, USA
2. Hotchkiss Brain Institute, University of Calgary, Calgary, AB, Canada
3. Department of Psychology, University of Alberta, Edmonton, AB, Canada
4. Department of Physiology, University of Alberta, Edmonton, AB, Canada
5. Neuroscience and Mental Health Institute, University of Alberta, Edmonton, AB, Canada

\*Corresponding author and lead contact: J.S.F. [j Farrell@stanford.edu](mailto:j Farrell@stanford.edu)

#Authors contributed equally to this work

### Abstract

Long-lasting confusion and memory difficulties during the postictal state remain a major unmet problem in epilepsy that lacks pathophysiological explanation and treatment. Previously, we demonstrated that the postictal period is marked by a long-lasting stroke-like event in both animal models and humans with epilepsy (Farrell et al., 2016). Here, we assessed potential mechanisms by which this vascular event leads to memory impairment by studying the hippocampus of rodent seizure models. While neuronal activity and local field oscillations were unchanged during the postictal state, memory and long-term potentiation of the temporoammonic pathway to CA1 were significantly impaired, but only when severe local hypoxia occurred. Prevention of postictal stroke-like events by cyclooxygenase inhibition rescued memory impairment and supports a necessary role of hypoperfusion/hypoxia in postictal amnesia. These results provide an objective pathophysiological criterion for defining the postictal state and identifies a strategy and potential drug candidates for treating it.

### Key Words

Seizure, Hypoperfusion, Hypoxia, Hippocampus, Memory

## Introduction

The postictal state is marked by brain region-specific dysfunction, can last up to several hours, and be a significant cause of morbidity in epilepsy (Fisher and Schachter, 2000; Kanner, 2000; Josephson et al., 2016). While the principal goal of epilepsy therapy is to completely prevent seizures, this is not attained in 30-40% of patients, including up to 75% of persons with lesional temporal lobe epilepsy (Kim et al., 1999). Modern antiseizure medications have not reduced the proportion of drug refractory epilepsy (Löscher and Schmidt, 2011) and periods of postictal confusion and memory difficulties are a common source for lowered quality of life. A major unmet need not covered in modern epilepsy therapies is the prevention of postictal impairments, which long outlast seizures and are a major hurdle impeding the return to daily life. Thus, the postictal state represents an opportunity for fundamentally new treatments.

Defining the postictal state has been difficult because of the lack of a pathophysiological biomarker. Postictal EEG often detects a suppression of activity beginning immediately after seizure termination, but this lasts less than a few minutes (So and Blume, 2010). Critically, postictal amnesia and other cognitive/behavioral impairments occur on a vastly longer time-scale of tens of minutes to hours when clear EEG abnormalities are not observed (Fisher and Engel Jr., 2008). While the pathophysiological underpinnings of postictal impairments remain elusive, recent data highlight a potential causal role for severe and local postictal hypoperfusion/hypoxia that occurs in rodents and people (Farrell et al., 2016; Gaxiola-Valdez et al., 2017; Li et al., 2019). Therefore, postictal vasoconstriction-induced hypoperfusion/hypoxia could provide an objective pathophysiological biomarker for defining the postictal period (Farrell et al., 2017). Indeed, blocking this long-lasting stroke-like event with pharmacological tools (e.g. L-type calcium channel blockers or cyclooxygenase-2, COX-2, inhibitors) prevents the occurrence of postictal behavioral symptoms following focal seizures (Farrell et al., 2016). Moreover, seizure models without a postictal state do not experience postictal hypoperfusion/hypoxia (Farrell et al., 2018). While these studies support a central vascular role for postictal behavioral impairment, the underlying mechanisms are not fully understood and must be resolved to better understand the consequences of severe postictal hypoperfusion/hypoxia on synaptic plasticity and memory function.

Here, we used the COX inhibitor, acetaminophen, as a tool to block hypoperfusion/hypoxia following brief non-convulsive hippocampal seizures to understand the effect of severe hypoxia ( $pO_2 > 10\text{mmHg}$ ) on hippocampal physiology and behavior. Experiments were performed *in vivo* to maintain an intact neurovascular unit and were designed to address which specific aspects of hippocampal network function, including CA1 pyramidal neuronal activity, local extracellular oscillations, synaptic function, and long-term potentiation (LTP), are impaired following seizures. Only LTP, but not the other metrics of network function, was impaired postictally in a hypoxia-dependent manner, which was consistent with the postictal memory impairment that was prevented by acetaminophen. These results provide insight into how seizures, but more importantly the resulting stroke-like event, lead to long-lasting postictal memory impairments and form the basis for a unique class of epilepsy therapies that target the secondary consequences of seizures when seizure control is not achieved.

## Results

### Kindled Seizures Lead to Prolonged Vasoconstriction That Does Not Suppress Neuronal Activity

We first tested the hypothesis that severe hypoperfusion/hypoxia in the postictal state suppresses neuronal activity, which is expected to occur under conditions of poor neurovascular coupling (Iadecola, 2017). Since COX inhibitors have been previously shown to prevent postictal hypoperfusion/hypoxia (Farrell et al., 2016), we used acetaminophen as a tool to inhibit COX-2 and result in seizures with hypoperfusion/hypoxia (vehicle pre-treatment) or without (acetaminophen pre-treatment). Neuronal activity was measured by 2-photon imaging of somatic calcium activity with GCaMP6f (Chen et al., 2013) simultaneously in hundreds of CA1 pyramidal neurons from awake, head-fixed mice on a treadmill (Figure 1A). This approach also enabled the ability to

measure blood vessel diameter (absence of fluorescence), thereby providing a method for simultaneous assessment of the severity of postictal hypoperfusion (Figure 1A).

We first determined seizure characteristics, since previous data reports that longer seizures result in more severe hypoperfusion/hypoxia (Farrell et al., 2016). Seizures were elicited by brief electrical stimulation (kindling: 1ms biphasic pulses  $<200\mu\text{A}$  at 60Hz for 1 second to the ventral hippocampus contralateral to the imaging cannula; Figure 1A) and resulted in short afterdischarges (LFP trace in Figure 1C) with little to no behavioral manifestation (corresponding to stage 0-1 on the Racine scale; Racine, 1972). The electrographic seizure duration was not significantly different for vehicle vs. acetaminophen pre-treatment ( $20.5 \pm 4.0$  vs.  $27.4 \pm 4.4$  s;  $t(4)=1.49$ ,  $p=0.21$ , paired t-test). We then assessed intracellular calcium activity during seizures to understand the upstream events that lead to COX-2-dependent vasoconstriction and severe hypoxia, since elevated intracellular calcium is necessary to mobilize COX-2 substrates (Weis and Malik, 1986; Di Marzo et al., 1994; Wilson and Nicoll, 2002; Lecrux et al., 2011). Despite the limited behavioral manifestation induced by these kindled seizures, virtually all recorded neurons in the field of view were profoundly activated during seizures (Figure 1B; Video 1; 99.6% of units had  $> 6$  sd activity increase). Moreover, the calcium activity after stimulation manifested in two distinct phases: (1) a synchronous increase in calcium activity that coincided with electrographic seizure activity and (2) a spreading wave that was closely associated with flattening of the LFP and is consistent with the occurrence of a spreading depolarization event (Figure 1C; Enger et al., 2015). The calcium wave, however, resulted in a 3 times greater calcium signal than the seizure itself ( $3.0 \pm 0.46$  times greater area under,  $t(4)=6.62$ ,  $**p=0.003$ , one-sample t-test, data from vehicle-treated mice; Figure 1- figure supplement 1), highlighting that most of the calcium activity occurred while the LFP was flat and neuronal activity was suppressed (Figure 1C). Importantly, the total calcium activity accumulated during both phases were not significantly different with acetaminophen pre-treatment (Figure 1D, though see also Figure 1 – figure supplement 1B,C as individual phases differ). Since acetaminophen did not alter seizure duration or the total calcium activity associated with the seizure and spreading depolarization, we next examined acetaminophen's effects on the much longer timescale of the postictal state (Figure 1B).

A mean reduction in vessel diameter of 15% was measured at 20- and 40-minutes post-seizure in mice that received vehicle (Figure 1E), similar to what was previously reported in vitro (14%, Farrell et al., 2016). Vasoconstriction resolved by 80 minutes and, importantly, was prevented by pre-treatment with acetaminophen (Figure 1E), illustrating the dissociation of experimental groups (similar seizure dynamics but either with or without hypoperfusion/hypoxia). We then derived unit event activity from somatic calcium traces (Figure 1A) and, surprisingly, observed no effect of postictal vasoconstriction on unit event rate (Figure 1F,G). These results are in line with action potential firing rates recorded from people undergoing epilepsy monitoring, where units are transiently suppressed immediately after a seizure, as seen acutely during the spreading calcium wave in Figure 1C, but make a complete recovery within a few minutes (Merricks et al., 2015). Thus, CA1 pyramidal neuron activity is preserved throughout the extended postictal state, even under conditions of restricted blood flow following seizures.

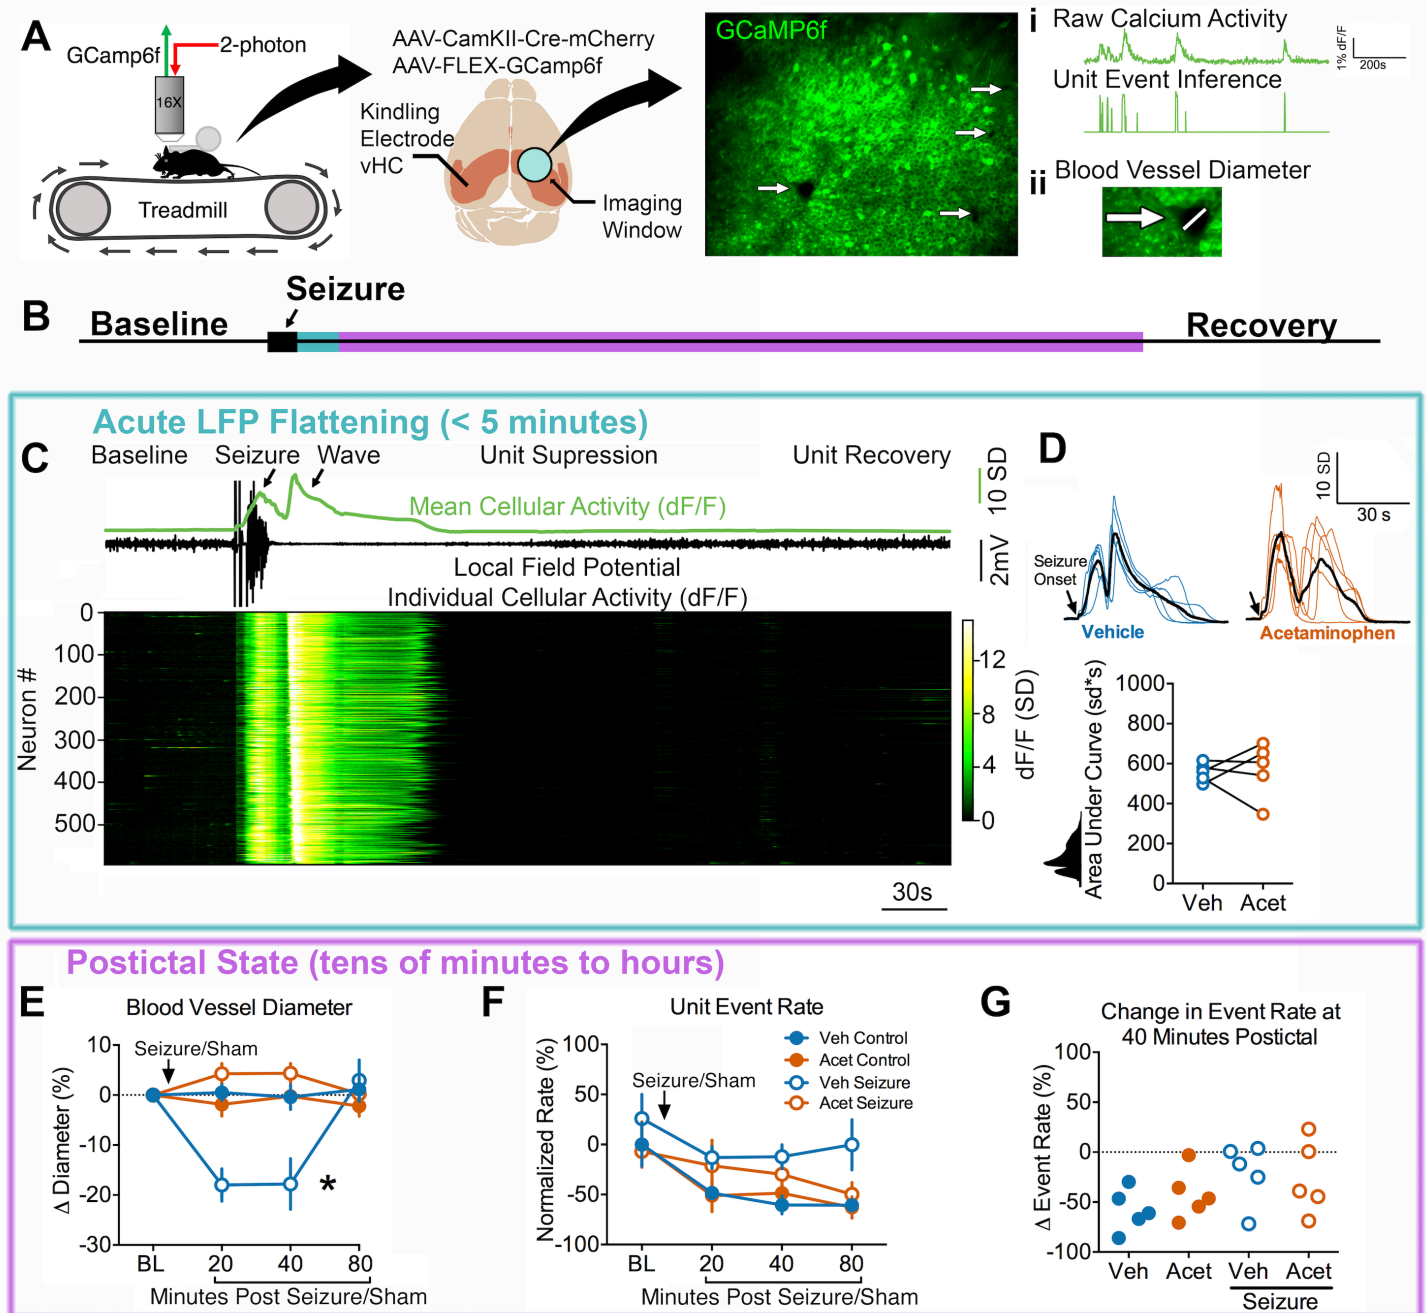

**Figure 1**

**Kindled Seizures Engage All Recorded CA1 Pyramidal Neurons and Result in a Secondary Calcium Wave**

(A) Experimental set-up. Awake, head-fixed mice moved voluntarily on a linear treadmill while being imaged on a 2-photon microscope. Two viruses were used to achieve GCaMP6f expression in CA1 pyramidal neurons. Seizures were elicited and electrographically recorded in the contralateral ventral hippocampus. Measurements obtained were (i) a change in neuronal calcium activity as a change in GCaMP6f fluorescence, extracted unit activity inferred from the calcium trace, and (ii) blood vessel diameter as seen by a clear absence of GCaMP6f expression.

(B) Relative timeline associated with the dependent measurements in the following panels corresponding to acute LFP flattening (blue; C and D) and the longer postictal state (purple; E-G).

(C) Representative seizure recording from a mouse treated with vehicle. Calcium traces from 594 neurons plotted with the mean change in fluorescence (displayed as z-score; scale shows number of standard deviations (SD)) and LFP. Neurons are arranged by the timing of wave onset. Seizures resulted in recruitment of all neurons, followed by an intense prolonged calcium wave, suppression of firing, and recovery.

(D) Mean calcium trace from all recorded neurons of each individual mouse (n=5 for each) is plotted and aligned at seizure onset. Colored traces are from individual mice pre-treated with vehicle (blue; dimethyl sulfoxide) or acetaminophen (orange; 250mg/kg i.p.) with each group mean overlaid in black. Bottom: Quantification. The total area under the curve was not significantly different for pre-treated with acetaminophen or vehicle ( $t(4)=0.22$ ,  $p=0.84$ ).

(E) Change in blood vessel diameter from pre-seizure/sham level baseline (BL). Within subject 2-way ANOVA revealed a significant effect of time ( $F(3,12)=4.42$ ,  $p=0.03$ ), condition ( $F(3,12)=6.38$ ,  $p=0.008$ ), and an interaction ( $F(3,12)=12.39$ ,  $p<0.0001$ ). Tukey post-test demonstrated that vehicle injection with a seizure resulted in a significant decrease in blood vessel relative to vehicle injection without a seizure. Data are mean  $\pm$  SEM.

(F) Unit event rate normalized to the group mean of vehicle control condition. Within subject 2-way ANOVA showed an effect of time ( $F(3,12)=9.48$ ,  $p=0.002$ ), but no effect of condition ( $F(3,12)=2.08$ ,  $p=0.16$ ) or an interaction ( $F(3,12)=0.97$ ,  $p=0.48$ ). Only events during immobility were analyzed here, as movement was not consistently seen across imaging sessions. Data are mean  $\pm$  SEM.

(G) At 40 minutes post-seizure (or sham), the percent change from baseline unit event rate was calculated. No effect of treatment was observed (within subject 1-way ANOVA,  $F(3)=2.60$ ,  $p=0.15$ ).

### **Severe Postictal Hypoxia Does Not Alter Local Field Potential Oscillations in CA1**

We then assessed potential changes to CA1 network properties more broadly by examining LFP dynamics across the discrete synaptic layers of the CA1 and dentate gyrus (DG) (Figure 2A). Since LFP oscillations at these laminae reflect the net extracellular effect of the heterogeneous and cell type-specific local and long-range synaptic inputs (Buzsáki et al., 2012; Varga et al., 2014; Colgin et al., 2009; Furhmann et al., 2015), detailed examination of LFP provides a wide and sensitive assay for potential network impairment during postictal hypoperfusion/hypoxia. Simultaneous  $pO_2$  and LFP recordings were performed under light urethane anesthesia (Figure 3A), which mimics natural sleep dynamics of cycling between periods of slow oscillation and theta states, accompanied by faster gamma oscillations, and avoids the confound of behaviorally-driven LFP changes associated with awake behavior (Figure 3B, Wolansky et al., 2006; Clement et al., 2008). Despite the occurrence of severe hypoxia that lasted over an hour in the hippocampus ( $pO_2 < 10\text{mmHg}$ ), no prolonged postictal changes in LFP were observed in both theta and slow oscillation states (Figure 2B). Furthermore, the amplitude of theta (Figure 2C) and locations of current sinks and sources (Figure 2D) did not change across the hippocampal laminae during severe postictal hypoxia (Figure 2E). No postictal LFP changes were seen in awake mice, suggesting that anesthesia is not a confound (Figure 2 – figure supplement 1). When also considering lack of postictal changes calcium activity of CA1 pyramidal neurons, these results support the view that the resting network properties of CA1 are insensitive to severe hypoperfusion/hypoxia following seizures.

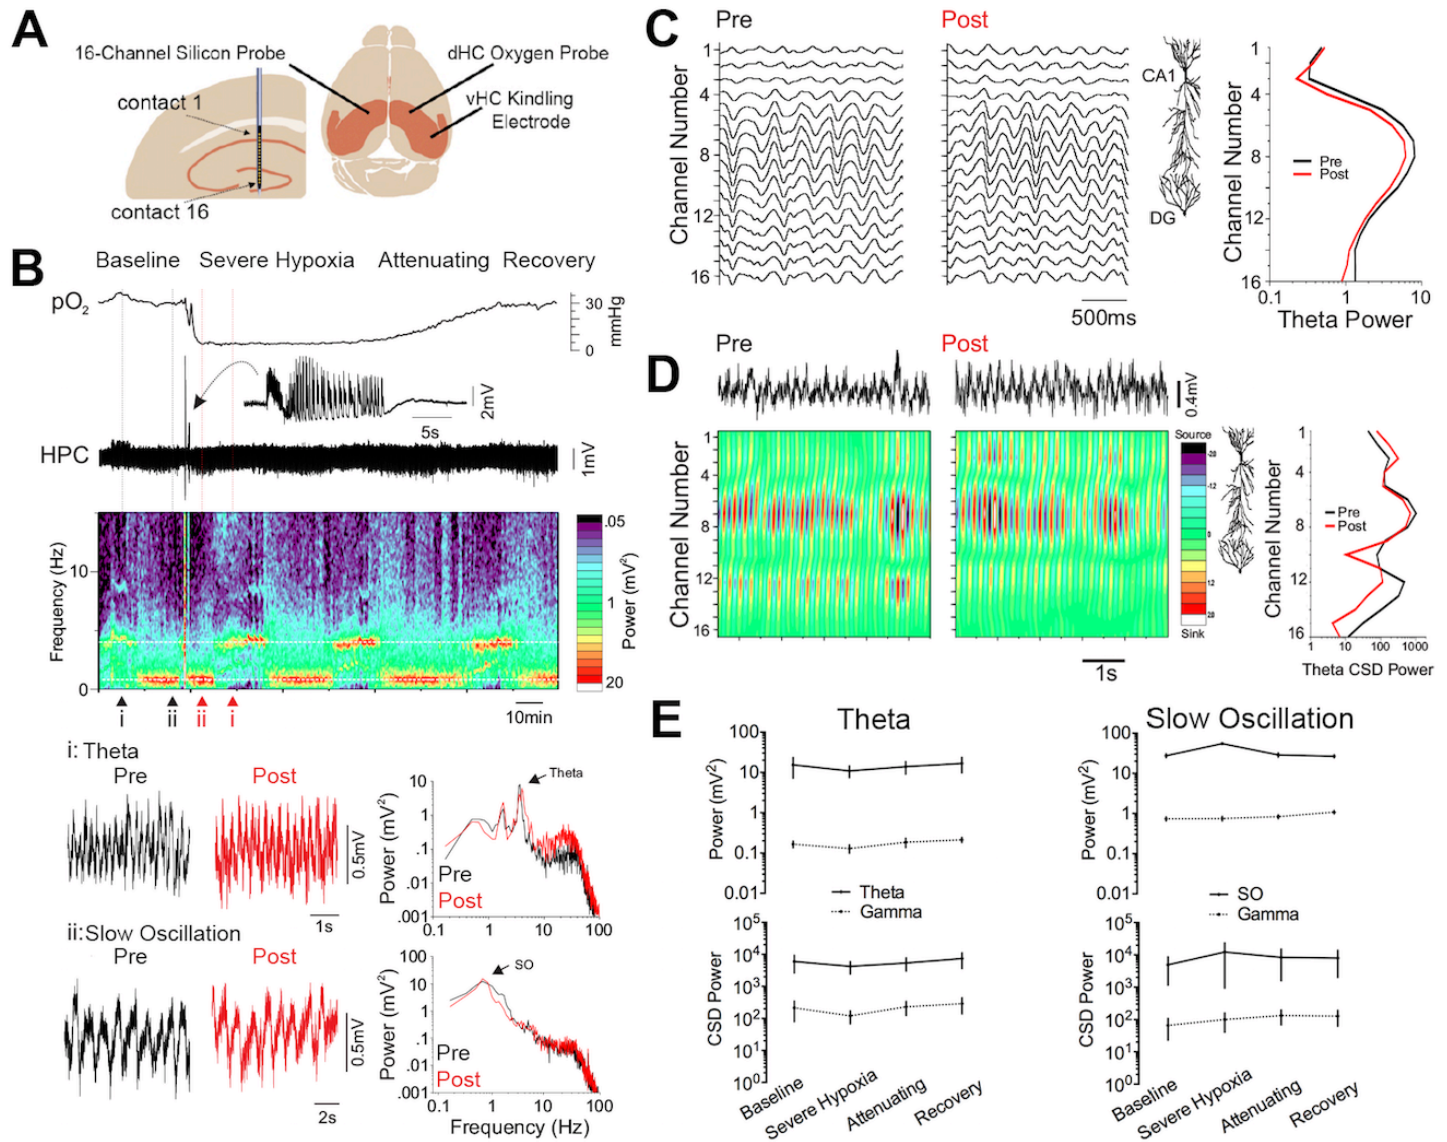

**Figure 2**

### Severe Postictal Hypoxia Does Not Change CA1 Network Oscillations

(A) Experimental recording paradigm. 16-channel silicon probes were lowered into the CA1 contralateral to the site of seizure initiation and oxygen recording.

(B) Representative recording of a brief seizure followed by prolonged, severe hypoxia. Raw traces of theta and slow oscillation are displayed according to their position in the spectrogram, which displays cycling between these two states. For these two states, power is plotted against frequency and reveals no amplitude changes across the frequency spectrum. Arrows indicate peak power for each state.

(C) Filtered theta pre and post seizures with theta power plotted as a function of depth. The location of high and low theta power is conserved before and after seizures.

(D) Current source density (CSD) analysis of the theta state shows overlapping sink and source locations before and after seizures.

(E) Quantification of C and D. 2-way ANOVA revealed no effect of time for theta ( $n=4$ ) and slow oscillation ( $n=5$ ) states for raw LFP power ( $F(3,42)=0.76$ ,  $p=0.52$ ) and CSD power ( $F(3,42)=0.39$ ,  $p=0.76$ ). Data are mean  $\pm$  SEM.

## Severe Postictal Hypoxia Prevents the Induction of LTP

Since no hypoperfusion/hypoxia-dependent changes in resting-state network functions were observed, as seen with cellular activity and LFP, we then postulated that additional demands to the network, beyond that of the resting state, may not be supported during postictal hypoxia. Here, we monitored the synaptic strength of the temporoammonic pathway (entorhinal cortex to CA1 via the perforant pathway), a synapse considered to be an important component for hippocampal computation and memory (Lisman and Otmakhova, 2001; Brun et al., 2007; Suh et al., 2011; Aksoy-Aksel and Manahan-Vaughan, 2013; Siwani et al., 2018), and tested whether high-frequency stimulation (HFS) could induce LTP following seizures with or without hypoxia (Figure 3A). As with previous experiments, kindling stimulation was delivered contralaterally so that the temporoammonic pathway under investigation would be affected by seizures and hypoxia, but not directly kindling stimulation. Indeed, no kindling-induced potentiation (Sutula and Seward, 1986) or changes in paired-pulse ratio were observed following kindling stimulation (Figure 3 – figure supplement 1A,C; but see Figure 3 – figure supplement 2 for an outlier with an extremely hypoxic hippocampus and suppressed evoked potentials). No change in evoked field potentials, even under conditions of severe hypoxia, is consistent with the unchanged LFP oscillations (Figure 2, Figure 2 - figure supplement 1), since a seizure-induced alteration in synaptic communication would likely be reflected in the LFP.

Long-term potentiation, as measured by a long-lasting increase in fEPSP slope, reliably occurred in sham-treated rats but did not occur in vehicle-treated rats following a seizure (Figure 3B,C). Importantly, rats pre-treated with acetaminophen did not display severe postictal hypoxia and had synaptic potentiation to a level not significantly different from sham-treated rats (Figure 3B,C; see Figure 3 – figure supplement 1B for analysis of LTP using post-seizure as baseline). Previous reports have demonstrated an inhibitory effect of COX inhibitors on LTP (Crowley et al., 2008; Yang and Chen, 2008; Chen and Bazan, 2003), though other studies demonstrate their ability to rescue of LTP under conditions of pathology (Kotilinek et al., 2008; Mohammadpour et al., 2015; Yang and Gao, 2017). Acetaminophen treatment here rescued LTP following seizures, perhaps owing to its ability to prevent postictal hypoxia. This hypothesis is clearly supported by the strong positive correlation of postictal  $pO_2$  with the change in slope of the fEPSP; strength of potentiation (Figure 3D). Thus, a seizure *per se* does not impair LTP. Rather, a postictal stroke-like event impairs the induction of a long-term increase in synaptic strength.

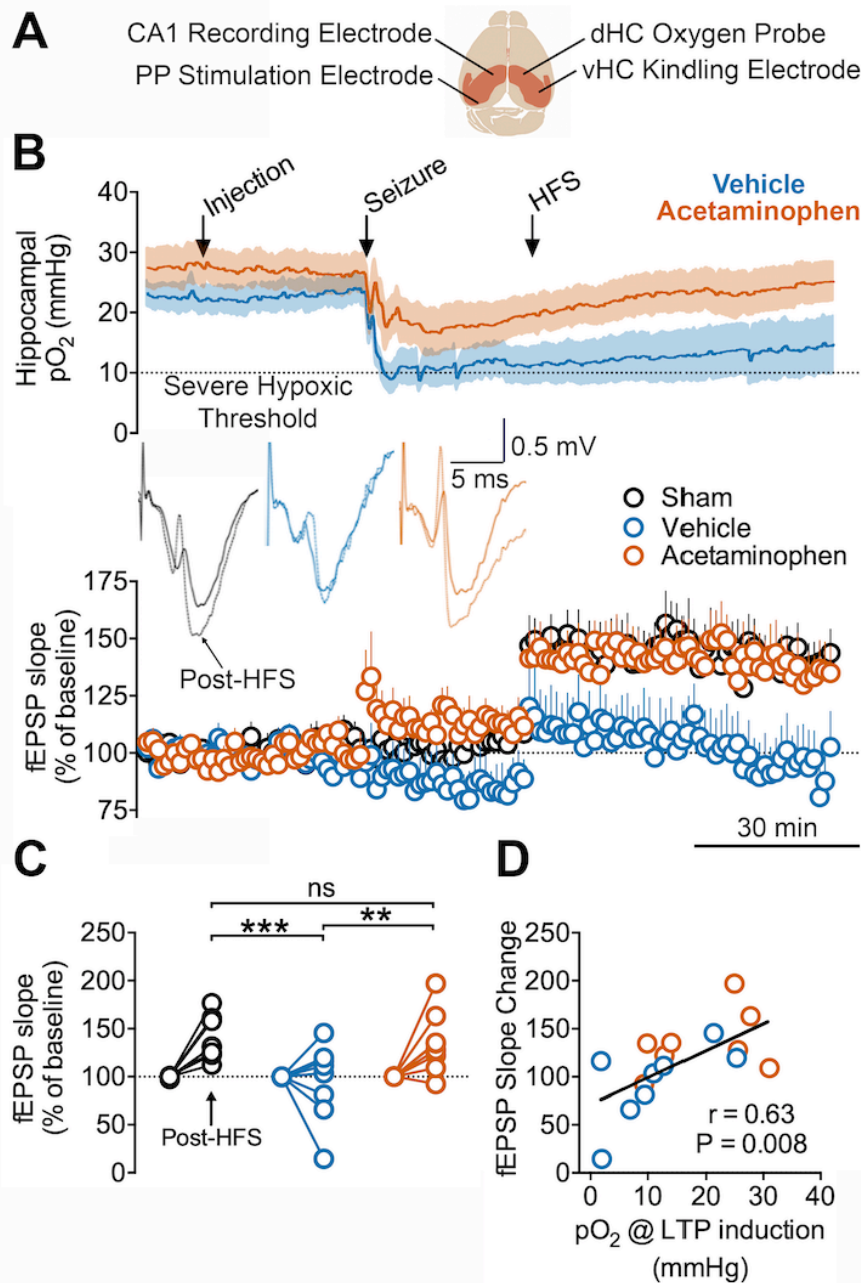

**Figure 3**

### Severe Postictal Hypoxia Prevents LTP

(A) Recording paradigm. The right hemisphere was used for seizure induction and oxygen monitoring while the left hemisphere was used for electrophysiology of the PP-CA1 synapse. Responses were collected under urethane anesthesia from an acute electrode aim at the stratum lacunosum moleculare of CA1. fEPSPs were evoked every 20 s and 3 consecutive responses were then averaged (one per minute).

(B) Concurrent oxygen and electrophysiological recordings from rats that either went severely hypoxic or not after kindled seizures. Mean fEPSP slope  $\pm$  SEM for each group is displayed before and after HFS. Inset shows representative evoked potentials from a rat in each group before (pre-injection, 10 min baseline) and after HFS (45-55 min post-HFS).

(C) Quantification of B. Data from 45-55 minutes post-HFS was compared to the initial baseline (pre-injection). Two-way ANOVA revealed an effect of HFS ( $F(2,21) = 4.61$ ,  $p=0.02$ ), group assignment ( $F(1,21) = 12.3$ ,  $p=0.02$ ), and an interaction ( $F(2,21) = 4.61$ ,  $p=0.02$ ). Tukey multiple comparisons are shown with significance levels (\*\* $p < 0.01$ , \*\*\* $p < 0.001$ )

(D) The postictal oxygen level at the time of LTP induction had a significant, positive correlation with the change in fEPSP slope.



## Severe Postictal Hypoxia Impairs Memory

Lastly, we investigated the potential consequences of impaired LTP mechanisms during severe postictal hypoxia on hippocampal-dependent memory performance. Memory was assessed using the object/context mismatch task, which requires both object and environmental context recognition and an intact hippocampus (Mumby et al., 2002; Spanswick and Sutherland, 2010). In this task, rats explored objects that were paired with distinct environments (e.g. different lighting and behavioral chambers) and revisit one of the environments with one of the previously paired objects substituted for an object of the other context (Figure 4A). Sham-treated controls demonstrate a clear preference for the object that is unfamiliar to that environmental context (Figure 4C), indicating memory of the prior object/context pairing. Other rats were administered vehicle or acetaminophen before a seizure to have groups of rats with or without severe hypoxia (Figure 4B), respectively, while performing the task in the postictal period. Preference for the novel object-context pairing did not occur in vehicle-treated rats but was rescued to control levels in acetaminophen-treated rats (Figure 4C). Thus, much like LTP, postictal hypoperfusion/hypoxia, but not seizures *per se*, impaired memory performance.

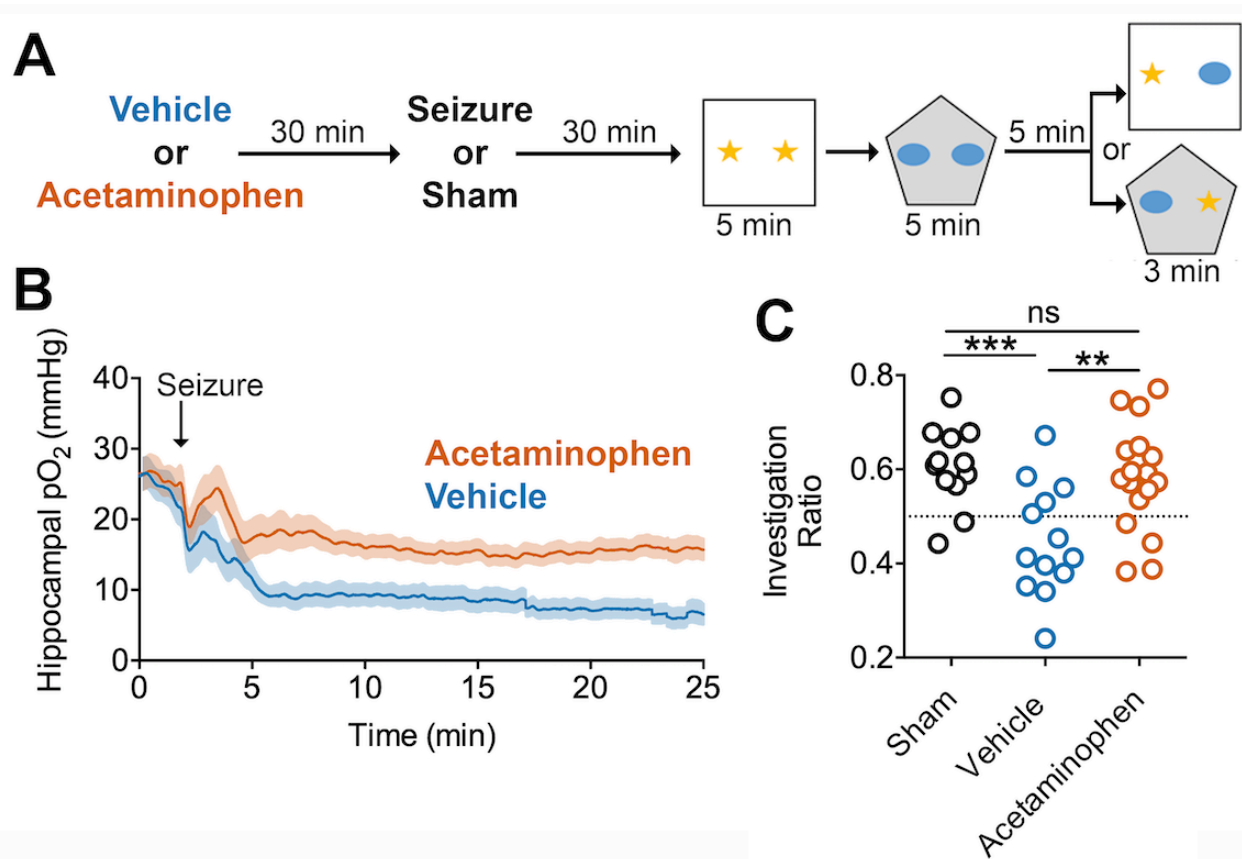

**Figure 4**

### Acetaminophen Prevents Severe Hypoxia and Rescues Postictal Amnesia

(A) Experimental paradigm – Object-Context Mismatch.

(B) Oxygen recordings just prior to the memory task that demonstrate experimental separation of seizure from the resulting hypoxic event by acetaminophen pre-treatment.

(C) Investigation ratio of the novel object to the familiar object for the paired context. Acetaminophen prevented the seizure-induced memory impairment observed in vehicle-treated rats and performed no differently from sham controls (ANOVA  $F(2,40)=8.82$ , follow-up Tukey's test displayed, \*\*  $p<0.01$ , \*\*\* $p<0.0001$ ).

## Discussion

Given the disproportionately high energy requirements of the brain relative to other organs (Mink et al., 1981), it is expected that periods of inadequate cerebral blood flow drive neuronal dysfunction. However, the impacted subcomponents of neuronal function are less clear. The occurrence of postictal stroke-like events has emerged as an important missing link in the pathophysiology of epilepsy (Matthews et al., 2008; Rupprecht et al., 2010; Farrell et al., 2016; Gaxiola-Valdez et al., 2017; Leal-Campanario et al., 2017; Farrell et al., 2017) and is a strong candidate mechanism for the occurrence of postictal behavioral impairment. This study specifically examined the underlying mechanisms that drive postictal amnesia *in vivo* and highlights a crucial role for impaired LTP. This research is in line with observation that synaptic transmission is the most energetically demanding subcellular process in neuronal signaling (Attwell and Laughlin, 2001; Harris et al., 2012). Since synaptic changes that increase synaptic response amplitude, like LTP, also increase energy consumption (Harris et al., 2012), this process puts additional energy burdens on an already demanding process. Our results provide evidence that severe postictal hypoxia does not support synaptic potentiation but is still able to meet the energy requirements to maintain neuronal activity levels, LFP oscillations, and baseline evoked synaptic responses in the CA1. Thus, memory dysfunction in the postictal period is a hypoxia-dependent process that is principally driven by the impairment of LTP mechanisms.

The absence of major changes in neuronal activity, baseline synaptic function, and LFP oscillations is perhaps surprising in the context of the extremely low levels of oxygen recorded, since hypoxia is conventionally thought to alter these variables. While anoxia-mimicking conditions are known to profoundly impair synaptic function *in vitro* (Furling et al., 2000), these *in vitro* conditions are markedly different from *in vivo* where an approximately 40-50% reduction in blood flow and severe hypoxia locally occur (Farrell et al., 2016; Gaxiola-Valdez et al., 2017), but without complete anoxia. Interestingly, our dataset included one notable outlier with an almost anoxic hippocampus that uniquely demonstrated suppression of synaptic function. This opens the possibility that certain seizures, which drive exceptionally low oxygen levels, have more broad effects beyond LTP prevention and remains to be explored. Our results also differ from whole-body hypoxia exposure, which drives less severe cerebral hypoxia, but is known to drive EEG changes (Papadelis et al., 2007; Zhao et al., 2016). Whereas systemic hypoxia drives a strong homeostatic respiratory and arousal response that affect brain oscillations more globally (Buchanan and Richerson, 2010; Berthon-Jones and Sullivan CE, 1982), an important distinction of postictal severe hypoperfusion/hypoxia is its restriction to a few brain regions involved in the seizure (Farrell et al., 2016; Gaxiola-Valdez et al., 2017; Li et al., 2019).

While this study was designed to observe more readily apparent changes in neuronal function, more subtle changes cannot be ruled out. Changes in mean CA1 pyramidal neuronal activity or oscillations across the distinct laminae in this region were not observed, however, it is possible spike timing in relation to ongoing oscillations is disrupted (O'Keefe and Recce, 1993; Skaggs et al., 1996; Varga et al., 2014). It is also possible that task-specific changes, such as a peak frequency or amplitude shift in theta or gamma frequencies during exploration (Colgin et al., 2009; Trimper et al., 2014) or neuronal firing corresponding to spatial encoding (O'Keefe and Nadel, 1978; Wilson and McNaughton, 1993), were selectively impaired and remain to be determined. Changes in these neurophysiological mechanisms could certainly play a role, but the importance of modulating synaptic strength, as identified by this study, cannot be understated.

COX-2 is a crucial enzyme that mediates severe postictal hypoperfusion/hypoxia, whose substrates are mobilized in a calcium-dependent manner (Weis and Malik, 1986; Di Marzo et al., 1994; Wilson and Nicoll, 2002; Lecrux et al., 2011). An important aspect of this study was the examination of cellular calcium dynamics associated with seizures. In addition to the expected increase of neuronal calcium during a seizure, a spreading wave of calcium, consistent with spreading depolarization (Enger et al., 2015; Pietrobon and Moskowitz, 2014), was consistently observed. This relationship of seizures accompanied by spreading depolarization is often overlooked, as the direct current component of LFP and EEG are rarely recorded but is interestingly noted across many seizure models and

clinical epilepsy (Bragin et al., 1997; Vinogradova et al., 2006; Fabricus et al., 2008; Aiba and Noebels, 2015; Cain et al., 2017). Since the accumulation of calcium during the wave was three times greater than that of the seizure, spreading depolarization is clearly of considerable relevance for calcium-dependent molecular signaling in epilepsy pathophysiology, such as COX-2 (Rojas et al., 2019) and its crucial role in inducing local vasoconstriction and severe hypoxia that lasts for over an hour (Farrell et al., 2016). Since spreading depolarization is known to also result in a COX-2-dependent prolonged restriction of blood flow (Lauritzen et al., 1982; Garipey et al., 2017), this mechanistic overlap likely exacerbates postictal hypoperfusion/hypoxia when both seizures and spreading depolarization co-occur. These results further clarify the role of COX-2 in coordinating a postictal stroke-like event and highlight its potential as a prime drug target to prevent the secondary effects of seizures.

In summary, we identified a synaptic mechanism underlying memory impairment following seizures and highlight a central role for postictal stroke-like events in driving this deficit. These experiments reinforce the notion that postictal hypoperfusion/hypoxia is an objective pathophysiological biomarker to define the postictal period, as its occurrence is necessary for the occurrence of postictal behavioral impairment (e.g. absence seizures are not associated with postictal impairment or hypoperfusion/hypoxia, Farrell et al., 2018). Since new antiseizure drugs continue to fail to treat many epilepsies and leave people susceptible to seizures (Löscher and Schmidt, 2011), the postictal state remains a core problem in epilepsy (Fisher and Schachter, 2000; Kanner, 2000; Josephson et al., 2016). Thus, it is important to have a basic understanding of the secondary effects of seizures and have clinical tools to prevent them. Postictal behavioral impairments, like memory difficulties outlined here, are effectively treated in rodents using clinically-approved compounds and are strong candidates for translation.

## Materials and Methods

### Animal Ethics Statement

All experiments performed on rats and mice were approved by Life and Environmental Sciences Animal Care and Health Sciences Animal Care Committees at the University of Calgary and the Administrative Panel on Laboratory Animal Care (APLAC) at Stanford University, respectively. Rats and mice were group-housed in standard cages with unrestricted access to standard chow and water. Rats were single-housed after surgery. All experiments were performed during the light cycle.

### Seizure induction model

To elicit seizures in the rats and mice, we employed electrical kindling targeted at the ventral hippocampus. The chronically implanted electrode in this structure served as both the stimulating and recording electrode, which is facilitated by a switch to direct LFP to an amplifier (Grass Neurodata Acquisition System Model 12C-4-23 for rats, or A-M Systems model 1700 for mice) for recording or allow current to flow from a constant-current stimulator to evoke a seizure (Grass Technologies Model S88 for rats, or A-M Systems model 2100 for mice).

### Awake, head-fixed 2-photon imaging in mice

10 C57BL/6J adult (P90-P120) male mice (Jackson Laboratories, Strain#000664) were injected with 300nL of a 1:1 viral mixture into the CA1 of right dorsal hippocampus (2.2mm posterior, 2.4mm lateral, 1.3mm ventral to bregma). The viral mixture included full titer of AAVDJ-CamKII-mCherry-Cre (Stanford Neuroscience Gene Vector and Virus Core cat#GVVC-AAV-9, a gift generously provided by Karl Deisseroth) and AAV1-Syn-FLEX-GCaMP6f-WPRE-SV40 (Penn Vector Core cat# p2819, now addgene cat# 100833, a gift from The Genetically Encoded Neuronal Indicator and Effector Project (GENIE) & Douglas Kim; Chen et al., 2013) to facilitate specific expression in pyramidal neurons. Following one week of recovery a 3mm diameter imaging cannula was implanted as described in Kaifosh et al., 2014. Briefly, cannulae were constructed of 3mm glass coverslips (Warner Instruments) mounted to 2 mm long stainless-steel tubing (Tegra Medical). A ~3mm craniotomy centered at the injection site was performed and the cortex was aspirated. On the contralateral side, a twisted bipolar electrode (Invivo1) with 0.5mm tip separation was implanted into the ventral hippocampus

(3.2mm posterior, 2.7mm lateral, 4.0mm ventral to bregma). The implants were secured to the skull with cyanoacrylate glue, dental cement (Lang), and combined with a stainless-steel head-bar for subsequent imaging sessions. Following one to two weeks recovery, all mice underwent 5 kindling sessions (1 second of 60Hz biphasic 1msec square wave pulses) to confirm occurrence of electrographic seizures consistent with ventral hippocampal kindling, typically stage 0-1 on the Racine scale (Racine, 1972). We also checked for desirable viral expression with 2-photon microscopy and identified damaged hippocampi that may have occurred during implantation. 5/10 mice moved forward in the study. Reasons for exclusion included misplaced electrodes (2), poor imaging quality due to misplaced virus or damage from surgery (1), or mice removed their head-bar during handling (2).

Mice were acclimated to the imaging set-up for two 10-minute sessions prior to imaging, which consisted of walking/running and immobility on a 1m long belt while head-fixed to minimize the effects of stress during the experiment. Mice served as their own controls and underwent four conditions in counter-balanced order: (1) vehicle (dimethyl sulfoxide) + control (no seizure), (2) acetaminophen (250mg/kg i.p. from Sigma) + control, (3) vehicle + seizure, or (4) acetaminophen + seizure. Imaging sessions were performed at scheduled intervals to minimize the effects of photobleaching and timed to capture periods before and after seizures to observe the potential effect of postictal hypoperfusion/hypoxia (Figure 2). The imaging system consisted of a 2-photon microscope (NeuroLabware) controlled by Scanbox (scanbox.org), a GUI that runs in Matlab. For calcium movie analysis, we used the SIMA python package, which includes motion correction and cell segmentation (Kaifosh et al., 2014). The signals were extracted, and spike probabilities were estimated using Scanbox (Ringach et al., 2016). Only cells that had spikes in the pre-seizure period were included in the analysis. Since some imaging sessions did not include periods of movement, we only analyzed data collected during immobility.

Blood vessel diameter was determined in ImageJ. The first 1000 frames of each session were used to generate a maximum intensity projection image. In other words, for a given pixel within a 1000 frame movie, the maximum pixel intensity at any time-point becomes that pixel's intensity for the generated image. With this method, the neuropil and somas of the pyramidal cell layer appear bright, while blood vessels are dark. The mean change in blood vessel diameter for each imaging session was calculated from 3 identified blood vessels for control sessions and 5 identified blood vessels from seizure sessions.

To generate the plots of calcium activity during seizure and spreading depolarization, the extracted traces were converted to z-scored  $DF/F$  traces using a modified method of Jia et al (2011). The time-dependent baseline was estimated for each cell by fitting a 3<sup>rd</sup> order polynomial to the smoothed (100 frames symmetric sliding window average)  $F$  trace, excluding frames with running, negative peaks and the seizure period for the fit (frames 4000 to 6000 excluded from baseline fit for both seizure and control sessions). The z unit was determined by calculating the standard deviation (SD) of the  $DF/F$  trace, then recalculating the SD of the trace where it's below 2 SD.

### **16-channel silicon probe LFP recordings from urethane-anaesthetized rats**

16 adult male (300-400g) Long-Evans hooded rats (Charles River) were chronically implanted with an electrode for kindling in the right ventral hippocampus and an oxygen sensing probe in the right dorsal hippocampus as previously described (Farrell et al., 2016). The left side of the skull was marked for future acute recordings (3.5mm posterior, 2.2mm lateral to Bregma) by drilling a non-penetrating burr hole in the bone and marking with permanent marker. Thus, dental cement, jeweler screws, and a ground screw were confined to the right skull so as not to interfere with future microelectrode recordings. Following recovery of approximately one week, rats underwent 5-10 kindling sessions to confirm proper placement of the kindling electrode as evident by evoked seizures of stage 0-1 on the Racine scale and reliable oxygen recordings.

On test day, rats were anesthetized with 1.2g/kg of urethane i.p. (Sigma) dissolved in saline and secured into a stereotaxic frame. As previously described (Wolanksy et al., 2006), a 16-channel linear microelectrode array with 100 $\mu$ m spacing (U-probe, Plexon Inc, Dallas, Texas) was slowly lowered into the hippocampus contralateral to the stimulation electrode and oxygen probe. Each contact was filtered between 0.1 and 500 Hz and amplified 1000X via a 16-channel headstage (unity gain) and amplifier (Plexon Inc.). All signals were referenced to ground

and in turn, they were digitized at a sampling rate of 1kHz (Digidata 1440A + Axoscope; Molecular Devices, San Jose, CA). The probe was lowered until the apical dendritic border of the pyramidal cell layer (identified by extracellular reversal of theta rhythm) was situated in the dorsal third of the probe. Under anesthesia, 2 seconds of kindling stimulation at 1.5mA was used to elicit a seizure. Here, we analyzed data from a subset of rats that were injected with saline vehicle and experienced severe postictal hypoxia (n=4).

Raw LFP traces were visualized with AxoScope and signal analysis was conducted in Matlab (Mathworks, Natick, MA, USA) (Wolansky et al, 2006; Clement et al, 2008), which was subsequently visualized using Origin (Microcal Software, Northampton, MA, USA). For the initial analysis, we selected the maximal amplitude signal from the probe, typically located close at the level of stratum lacunosum moleculare (SLM) or the hippocampal fissure. We computed spectrograms using a sliding window method using a 30s window separated by increments of 10s across the entire time series of the experiment. Individual spectra were computed within these 30s windows using a Welch's averaged, modified periodogram method (pwelch) using 6s Hamming-windowed segments with 2s overlap. Spectra and spectrograms were inspected for characteristics of the activated (theta) or deactivated (SO) states by monitoring for peak logarithmic power in the 3 to 4.5 Hz versus 0.5 to 1.5 Hz bandwidths, respectively (Wolansky et al., 2006). In most cases, regular temporal fluctuations of the log-transformed power values within the 0.5 to 1.5 Hz bandwidth of spectrograms were sufficient to characterize the state (Clement et al., 2008). However, in some cases we used the ratio of log-transformed power values in the SO versus theta bandwidths since this tended to be a more sensitive index of state. Baseline and post-ictal samples of theta and/or SO activity were then used to characterize the properties and amplitudes of these state-dependent signals across time. In some cases, we could only analyze either one or the other state due to a lack of spontaneous samples occurring at an appropriate time point for analysis. For power measures, we extracted power at the relevant frequency peak for each state (theta 3.0 - 4.5Hz) and SO (0.5 - 1Hz) as well as in the gamma bandwidth (gamma during theta, 16.0 - 46.5Hz; gamma during SO, 14.0 - 39.5Hz). These data points were selected with respect to the timing of the hypoxic period. Maximal hypoxia occurred on average slightly less than 7 minutes following ictus and lasted up to an average of a full hour post-ictus. On average, measurements during maximal hypoxia were made 30 minutes post-ictus. The rising phase from maximal hypoxia started at an average of one hour following ictus and reached recovery phase after an average of approximately 100 minutes post-ictus. For the rising phase, measurements were made at an average of 80 minutes post-ictus while for the recovery phase, measurements were made at an average latency of 2 hours post-ictus.

For the same windowed segments of LFP, we used the full 16 traces from the probe to compute current source density (CSD), a spatial and temporal distribution of current sources and sinks underlying the voltage profile recorded (Wolansky et al, 2006; Nazer & Dickson, 2009). The underlying assumptions for calculating CSD are based upon previous research (Freeman & Nicholson, 1975; Ketchum & Haberly, 1993; Nicholson & Freeman, 1975; Rodriguez & Haberly, 1989). To compute CSD, we made estimations of the second spatial derivative of voltage traces derived from the multiprobe based on a three-point difference (differentiation grid size of 300  $\mu\text{m}$ ) on the voltage values across spatially adjacent traces and expressed as  $\text{mV}/\text{mm}^2$ , described previously in Wolansky et al (2006):

$$\text{CSD} = [f(p_{i-1}) - 2f(p_i) + f(p_{i+1})]/d^2$$

where  $f(p_i)$  is the field potential signal from probe channel  $i$  ( $i = 2, 3, \dots, 15$ ), and  $d$  is the distance between adjacent channels (0.1 mm). For traces at each end of the probe (i.e., channels 1 and 16), the differentiation grid was based solely on the immediately adjacent channel (e.g., channels 2 and 15, respectively). This latter procedure resulted in similar, if not identical, CSD results as the three-point differentiation method when we tested by successively eliminated probe end channels, re-computing and then comparing results obtained.

As with LFP spectral analysis, the CSD trace showing the largest fluctuations during both states (again at SLM) was spectrally analyzed throughout the entire experiment at the same time points pre and post-ictus as the LFP traces described above.

### **LTP induction in urethane-anesthetized rats**

Twenty-four Long-Evans rats (Charles River) previously chronically implanted with a bipolar stimulating electrode in the right ventral hippocampus and an oxygen probe in the dorsal right hippocampus (same coordinates as LFP experiment), were anesthetized with urethane (1.2 g/kg, i.p.) and positioned in a stereotaxic frame. All rats, including sham-treated, received 5-10 seizures prior to experimentation to ensure consistent seizure and hypoxia elicitation. All rats also participated in the object-context mismatch task prior to LTP experimentation. Body temperature was maintained by a heating pad with a temperature controller unit. Surgical procedure and field excitatory post-synaptic potential (fEPSP) recordings were performed in the left hemisphere of the brain as previously described (Colangeli et al 2017). Briefly, fEPSPs were evoked by stimulating the PP (AP: -7.9 L: 4.6 V: 2.6 - 3.2) with a stainless steel twisted bipolar electrode and recorded with an unipolar stainless-steel electrode implanted into the stratum lacunosum moleculare of the CA1 region of the hippocampus (AP: -3.2 L: 2.2 V: 2.6-2.8). During the surgical procedure, square-wave pulses of 0.2 ms duration were applied every 30 sec to the PP using a current stimulator (A-M system isolated pulse stimulator 2100). Both stimulating and recording electrodes were advanced slowly downward until reaching the optimal depth to record fEPSPs. After 60 min of post-surgical recovery, paired pulses were applied to record fEPSPs during the whole experiment which consisted of 10 min baseline, 30 min post-injection, 30 min post-seizure and 55 min post-HFS periods. Paired pulses were applied at different interpulse intervals (20, 25, 50, 100 ms) with a stimulus intensity set to evoke 40% of the fEPSP maximum slope.

Seizures were induced by delivering a kindling stimulation to the chronically-implanted electrode in the right hippocampus (2 s of 60 Hz biphasic 1 msec square wave pulses). HFS consisted of 10 trains of 15 pulses at 200 Hz, with 2 s delay between trains delivered to the PP using the same pulse parameters as in baseline. Signals were amplified using a MultiClamp 700B amplifier (Molecular Devices, high pass: 0.2 Hz, low pass: 5,000 Hz, gain: 200), digitized using an Axon Digidata 1440A data acquisition board (Molecular Devices) and stored on a personal computer using pClamp9 software (Molecular Devices). Sampling rate was set to 10 kHz.

### **Object-context mismatch memory task**

Twenty-four rats from the LTP experiment and an additional 19 rats were used in this study. All rats were chronically implanted with oxygen probes and electrodes (same coordinates) and received 5-10 seizures before testing. Prior to testing, rats were pre-exposed to two different contexts devoid of any objects for 10 minutes each, one immediately after the other, each day for two consecutive days (habituation). Context A was a large white box (60cm x 60cm) housed in a well-lit room. Context B was a large black pentagonal-shaped bin (60cm in diameter) housed in a dimly-lit room. On the third day (test day), each context contained a unique pair of identical objects. The first object pair were small green ceramic cups, placed base down in the center of the arena. The second object pair were blue plastic pipette-tip holders, also placed in the center of the arena. On the testing day, a seizure was elicited (or sham) and 30 minutes following seizure termination rats were removed from the recording chamber and transported to the behavioural rooms. Rats investigated each context with paired objects for 5 minutes, one immediately after the other. Rats were then placed into their home cages for a 5-minute delay. Following this, rats were re-exposed to one of the contexts, this time with a single object from each pair placed in the center of the arena. Rats were given 3 minutes to explore, and an investigation ratio (time spent investigating the unfamiliar object/context pairing divided by total investigation time) was calculated. The context chambers, bedding, and objects were thoroughly wiped with 70% ethanol after each use.

## **Acknowledgements**

The authors thank Bonita Gunning and Sylwia Felong for their technical support. J.S.F. is supported by a Canadian Institutes for Health Research (CIHR) postdoctoral fellowship. R.C. is supported by an Eyes High postdoctoral fellowship funded by the University of Calgary. M.D.W. is funded by an Alberta Innovates graduate studentship. B.D. is funded by an American Epilepsy Society Postdoctoral Fellowship. Experiments in the laboratory of C.T.D., I.S., and G.C.T. were funded by Natural Sciences and Engineering Research Council of Canada (Discovery Grant #2016-06576), National Institutes of Health (Grant #NS99457), and CIHR (Grant #MOP-130495), respectively.

## **Competing Interests**

The authors report no competing interests.

## Figure Supplements

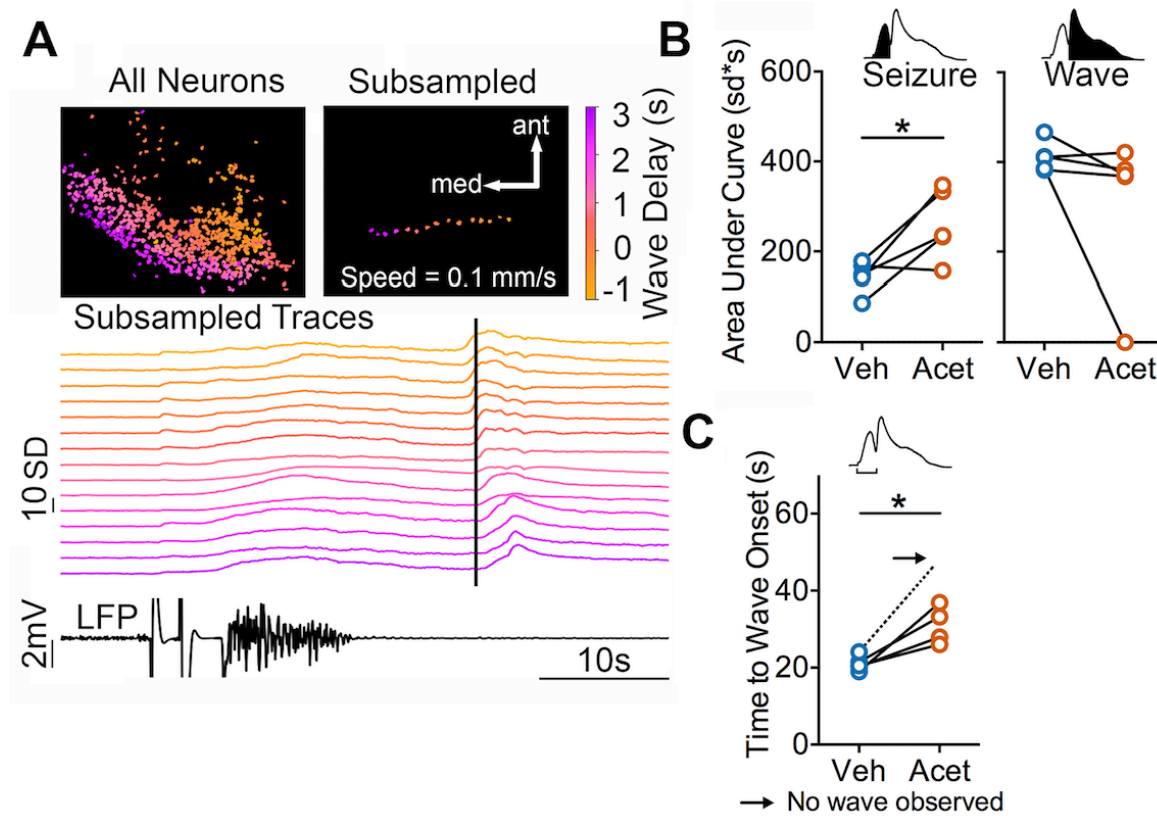

**Figure 1 – figure supplement 1**

### Seizure vs. Wave Dynamics Alterations by Acetaminophen

(A) Data from Figure 1C plotted to demonstrate spreading wave propagation direction and speed. For each recorded neuron, the color displayed corresponds to the delay of wave onset relative to the mean wave onset. Individual calcium traces from an unbiased subsampled group of 15 neurons show the direction of wave propagation travels towards the medial and posterior edges of the field of view. Arrows indicate medial and anterior directions. Vertical black bar indicates mean wave onset.

(B) Quantification of calcium dynamics during seizures and calcium waves. Acetaminophen increased the area under the curve during the seizure (left;  $t(4)=3.14$ ,  $p=0.03$ , paired t-test), but not the secondary wave (middle;  $t(4)=1.41$ ,  $p=0.23$ ). Y-axis applies to both graphs.

(C) Acetaminophen significantly delayed the onset of the calcium wave appearance from seizure onset (paired t-test,  $t(3)=3.93$ ,  $p=0.03$ ). In one case (arrow, dotted line), no calcium wave appeared (data not included in analysis), which is also evident in the top and middle plots.



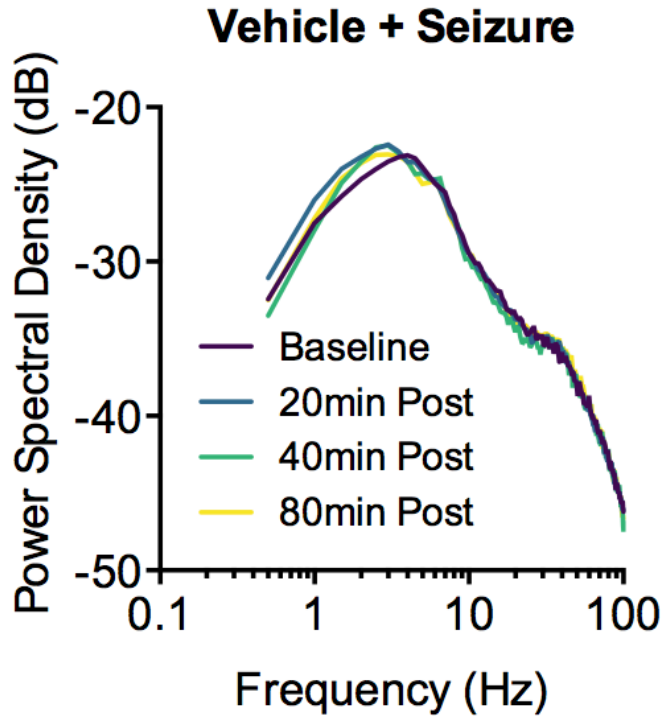

**Figure 2 – figure supplement 1**

**Postictal Vasoconstriction does not alter the Local Field Potentials in Awake Mice**

Mean power spectral density plots are displayed before and 20, 40, or 80 minutes after a seizure. LFP was recorded as a differential recording between the two poles (tips 0.5 mm apart) of the stimulating/recording electrode. Repeated measures ANOVA did not find an effect of time at the 0-4, 4-12, 25-55, and 55-100 Hz frequency bands.

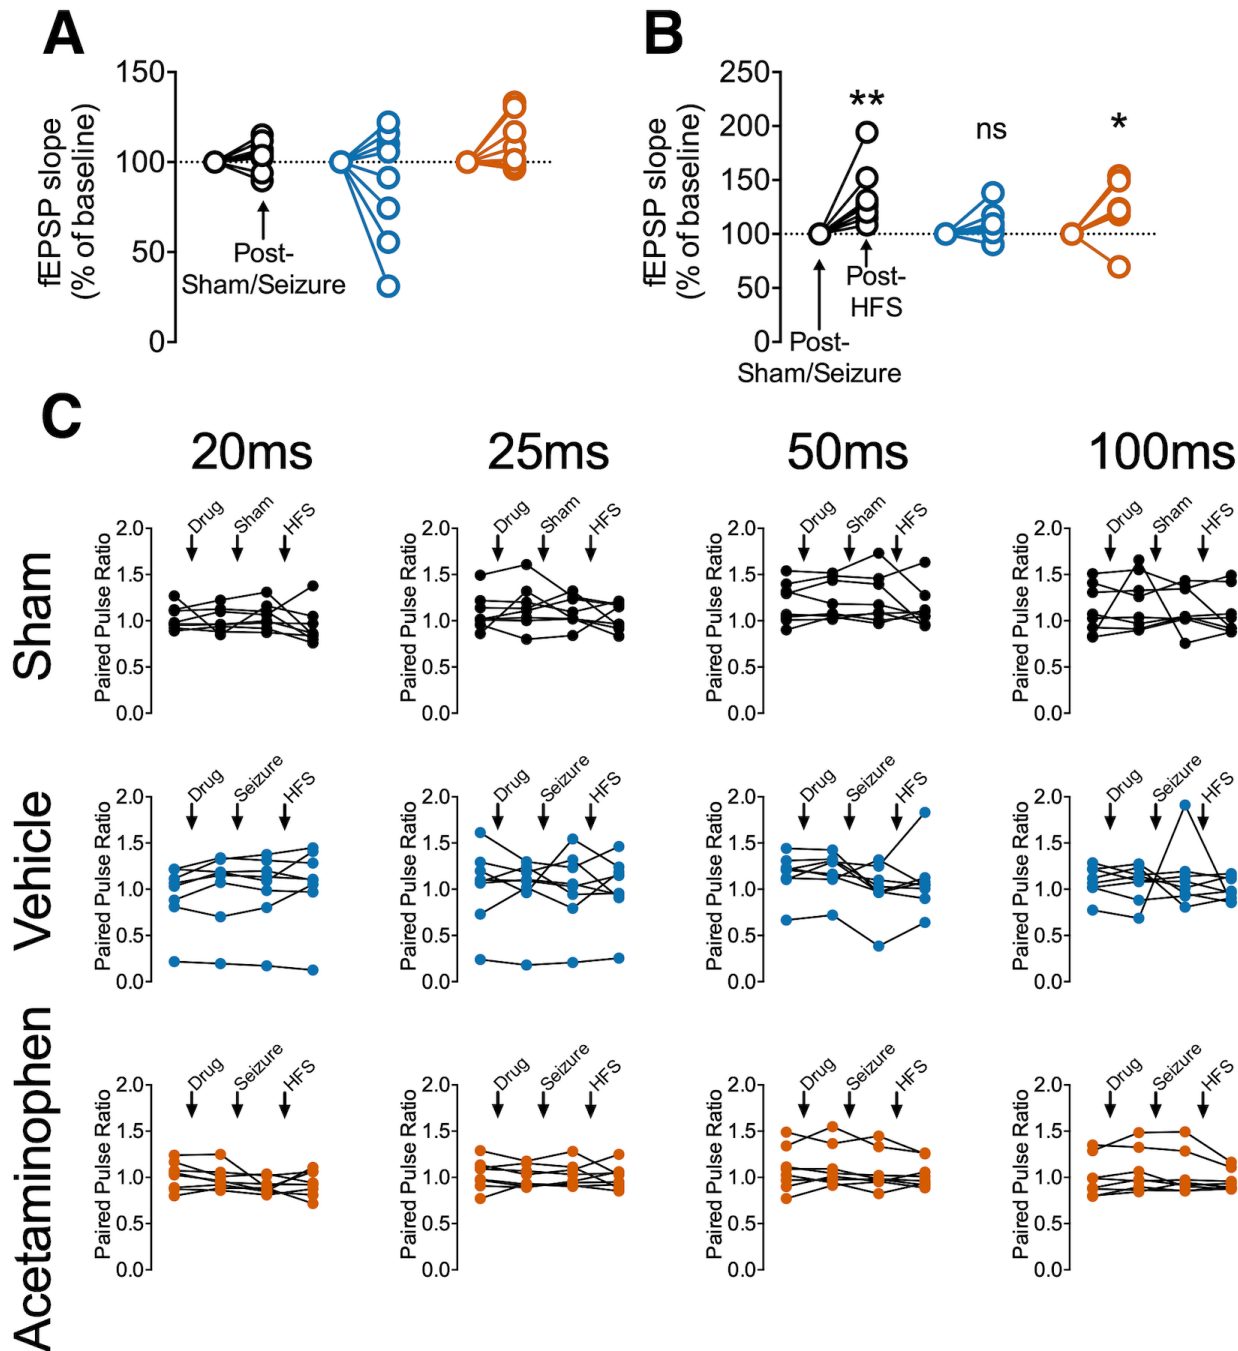

**Figure 3 – figure supplement 1**

**Seizures Do Not Disrupt Evoked Responses or Paired-Pulse Ratios**

(A) No significant changes in fEPSP slope were observed following kindling stimulation (or sham) (sham in black -  $t(7)=1.21$ ,  $p=0.27$ ; vehicle in blue -  $t(7)=1.03$ ,  $p=0.27$ ; acetaminophen in orange -  $t(7)=1.96$ ,  $p=0.09$ ).

(B) Data from Figure 3C normalized to a baseline beginning after the seizure or sham. Significant potentiation was observed in sham controls (black -  $t(7)=3.60$ ,  $p=0.0092$ ) and rats who received acetaminophen prior to seizure induction (orange -  $t(7)=2.49$ ,  $p=0.042$ ), whereas no significant potentiation was observed in rats that received vehicle prior to seizure (blue -  $t(7)=1.81$ ,  $p=0.11$ ).

(C) The paired pulse ratio from individual rats are plotted in a matrix according to the interval between the first and second pulse (20 -100ms) and treatment (Sham, Vehicle, or Acetaminophen). Paired one-way ANOVAs did not find a significant difference for any of the intervals or treatments.

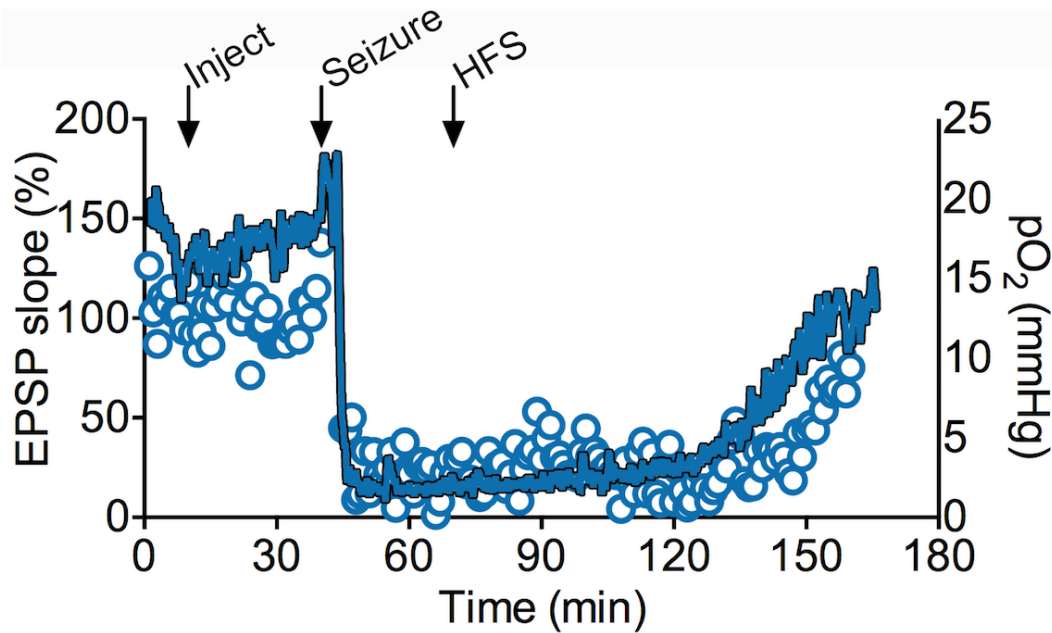

**Figure 3 – figure supplement 2**

**One Exceptional Example of Suppression of Evoked Potentials Following a Seizure.**

An uncharacteristic example of a rat that experienced the most severe hypoxia in the experiment. The minimum pO<sub>2</sub> reached 1.2mmHg and oxygen levels remained severely hypoxic (<10mmHg) for 102.8 minutes. Though LTP could not be induced, like other rats, a major reduction in evoked responses was uniquely noted during the entire postictal period. Note that the oxygen profile recovered before the evoked response recovered.

## References

- Aiba I, Noebels. Spreading depolarization in the brainstem mediates sudden cardiorespiratory arrest in mouse SUDEP models. *Sci. Transl. Med.* 2015; 7: 282ra46-282ra46.
- Aksoy-Aksel A, Manahan-Vaughan D. The temporoammonic input to the hippocampal CA1 region displays distinctly different synaptic plasticity compared to the Schaffer collateral input in vivo: significance for synaptic information processing. *Front. Synaptic Neurosci.* 2013; 5: 5.
- Attwell D, Laughlin SB. An energy budget for signaling in the grey matter of the brain. *J. Cereb. Blood Flow Metab.* 2001; 21: 1133-1145.
- Berthon-Jones M, Sullivan CE. Ventilatory and arousal responses to hypoxia in sleeping humans. *Am. Rev. Respir. Dis.* 1982; 125: 632-639.
- Buchanan GF, Richerson GB. Central serotonin neurons are required for arousal to CO<sub>2</sub>. *Proc. Natl. Acad. Sci.* 2010; 201004587.
- Buzsáki G, Anastassiou CA, Koch C. The origin of extracellular fields and currents—EEG, ECoG, LFP and spikes. *Nat. Rev. Neurosci.* 2012; 13: 407-420.
- Bragin A, Penttonen M, Buzsáki G. Termination of epileptic afterdischarge in the hippocampus. *J. Neurosci.* 1997; 17: 2567-2579.
- Brun VH, Leutgeb S, Wu HQ, Schwarcz R, Witter MP, Moser EI et al. Impaired spatial representation in CA1 after lesion of direct input from entorhinal cortex. *Neuron* 2008; 57: 290-302.
- Cain SM, Bohnet B, LeDue J, Yung AC, Garcia E, Tyson JR et al. In vivo imaging reveals that pregabalin inhibits cortical spreading depression and propagation to subcortical brain structures. *Proc. Natl. Acad. Sci.* 2017; 114: 2401-2406.
- Chen C, Bazan NG. Acetaminophen modifies hippocampal synaptic plasticity via a presynaptic 5-HT<sub>2</sub> receptor. *Neuroreport* 2003; 14: 743-747.
- Chen TW, Wardill TJ, Sun Y, Pulver SR, Renninger SL, Baohan A et al. Ultrasensitive fluorescent proteins for imaging neuronal activity. *Nature* 2013; 499: 295-300.
- Clement EA, Richard A, Thwaites M, Ailon J, Peters S, Dickson CT. Cyclic and sleep-like spontaneous alternations of brain state under urethane anaesthesia. *PloS one* 2008; 3: p.e2004.
- Colangeli R, Pierucci M, Benigno A, Campiani G, Butini S, Di Giovanni G. The FAAH inhibitor URB597 suppresses hippocampal maximal dentate afterdischarges and restores seizure-induced impairment of short and long-term synaptic plasticity. *Sci. Rep.* 2017; 7: 11152.
- Colgin LL, Denninger T, Fyhn M, Hafting T, Bonnevie T, Jensen O et al. Frequency of gamma oscillations routes flow of information in the hippocampus. *Nature* 2009; 462: 353-359.
- Cowley TR, Fahey B, O'mara SM. COX-2, but not COX-1, activity is necessary for the induction of perforant path long-term potentiation and spatial learning in vivo. *Eur. J. Neurosci.* 2008; 27:2999-3008.
- Di Marzo V, Fontana A, Cadas H, Schinelli S, Cimino G, Schwartz JC et al. Formation and inactivation of endogenous cannabinoid anandamide in central neurons. *Nature* 1994; 372: 686-691.

- Enger R, Tang W, Vindedal GF, Jensen V, Johannes Helm P, et al. Dynamics of ionic shifts in cortical spreading depression. *Cereb. Cortex* 2015; 25: 4469-4476.
- Fabricius M, Fuhr S, Willumsen L, Dreier JP, Bhatia R, Boutelle MG, et al. Association of seizures with cortical spreading depression and peri-infarct depolarisations in the acutely injured human brain. *Clin. Neurophysiol.* 2008; 119: 1973-1984.
- Farrell JS, Gaxiola-Valdez I, Wolff MD, David LS, Dika HI, Geeraert BL, et al. Postictal behavioural impairments are due to a severe prolonged hypoperfusion/hypoxia event that is COX-2 dependent. *Elife* 2016; 5: e19352.
- Farrell JS, Colangeli R, Wolff MD, Wall AK, Phillips TJ, George A, et al. Postictal hypoperfusion/hypoxia provides the foundation for a unified theory of seizure-induced brain abnormalities and behavioral dysfunction. *Epilepsia* 2016; 56:1493-1501.
- Farrell JS, Greba Q, Snutch TP, Howland JG, Teskey GC. Fast oxygen dynamics as a potential biomarker for epilepsy. *Sci. Rep.* 2018; 8: 17935.
- Fisher RS, Engel Jr JJ. Definition of the postictal state: When does it start and end?. *Epilepsy Behav.* 2010; 19: 100-104.
- Fisher RS, Schachter SC. The postictal state: a neglected entity in the management of epilepsy. *Epilepsy Behav.* 2000; 1: 52-59.
- Fuhrmann F, Justus D, Sosulina L, Kaneko H, Beutel T, Friedrichs D. Locomotion, theta oscillations, and the speed-correlated firing of hippocampal neurons are controlled by a medial septal glutamatergic circuit. *Neuron* 2015; 86: 1253-1264.
- Furling D, Ghribi O, Lahsaini A, Mirault ME, Massicotte G. Impairment of synaptic transmission by transient hypoxia in hippocampal slices: improved recovery in glutathione peroxidase transgenic mice. *Proc. Natl. Acad. Sci.* 2000; 97: 4351-4356.
- Gariépy H, Zhao J, Levy D. Differential contribution of COX-1 and COX-2 derived prostanoids to cortical spreading depression—Evoked cerebral oligemia. *J. Cereb. Blood Flow Metab.* 2017; 37: 1060-1068.
- Gaxiola-Valdez I, Singh S, Perera T, Sandy S, Li E, Federico P. Seizure onset zone localization using postictal hypoperfusion detected by arterial spin labelling MRI. *Brain* 2017; 140: 2895-2911.
- Harris JJ, Jolivet R, Attwell D. Synaptic energy use and supply. *Neuron* 2012; 75: 762-777.
- Iadecola C. The neurovascular unit coming of age: a journey through neurovascular coupling in health and disease. *Neuron* 2017; 96: 17-42.
- Jia H, Rochefort NL, Chen X, Konnerth A. In vivo two-photon imaging of sensory-evoked dendritic calcium signals in cortical neurons. *Nat. Protoc.* 2011; 6: 28-35.
- Josephson CB, Engbers JD, Sajobi TT, Jette N, Agha-Khani Y, Federico P, et al. An investigation into the psychosocial effects of the postictal state. *Neurology* 2016; 86: 723-730.
- Kaifosh P, Zaremba JD, Danielson NB, Losonczy A. SIMA: Python software for analysis of dynamic fluorescence imaging data. *Front. Neuroinform.* 2014; 8: 80.

- Kanner AM. There is more to epilepsy than seizures: a reassessment of the postictal period. *Neurology* 2000; 54: A352.
- Kim WJ, Park SC, Lee SJ, Lee JH, Kim JY, Lee BI et al. The prognosis for control of seizures with medications in patients with MRI evidence for mesial temporal sclerosis. *Epilepsia* 1999; 40: 290-293.
- Kotilinek LA, Westerman MA, Wang Q, Panizzon K, Lim GP, Simonyi A, Lesne S, Falinska A, Younkin LH, Younkin SG, Rowan M et al. Cyclooxygenase-2 inhibition improves amyloid- $\beta$ -mediated suppression of memory and synaptic plasticity. *Brain* 2008; 131: 651-664.
- Lauritzen M, Jørgensen MB, Diemer NH, Gjedde A, Hansen AJ. Persistent oligemia of rat cerebral cortex in the wake of spreading depression. *Ann. Neurol.* 1982; 12: 469-474.
- Leal-Campanario, R., Alarcon-Martinez, L., Rieiro, H., Martinez-Conde, S., Alarcon-Martinez, T., Zhao, X., et al. Abnormal capillary vasodynamics contribute to ictal neurodegeneration in epilepsy. *Sci. Rep.* 2017; 7: 43276.
- Lecrux C, Toussay X, Kocharyan A, Fernandes P, Neupane S, Lévesque M. Pyramidal neurons are “neurogenic hubs” in the neurovascular coupling response to whisker stimulation. *J. Neurosci.* 2011; 31: 9836-9847.
- Li E, d’Esterre CD, Gaxiola-Valdez I, Lee T-Y, Menon B, Peedicail JS, Jetté N, Josephson CB, Wiebe S, Teskey GC, Federico P. CT perfusion measurement of postictal hypoperfusion: localization of the seizure onset zone and patterns of spread. *Neuroradiology* 2019; 61: 991-1010.
- Liou JY, Ma H, Wenzel M, Zhao M, Baird-Daniel E, Smith EH, et al. Role of inhibitory control in modulating focal seizure spread. *Brain* 2018; 141: 2083-2097.
- Lisman JE, Otmakhova NA. Storage, recall, and novelty detection of sequences by the hippocampus: elaborating on the SOCRATIC model to account for normal and aberrant effects of dopamine. *Hippocampus* 2001; 11: 551-568.
- Löschner W, Schmidt D. Modern antiepileptic drug development has failed to deliver: ways out of the current dilemma. *Epilepsia* 2011; 52: 657-678.
- Mathews MS, Smith WS, Wintermark M, Dillon WP, Binder DK. Local cortical hypoperfusion imaged with CT perfusion during postictal Todd’s paresis. *Neuroradiology* 2008; 50: 397-401.
- Merricks EM, Smith EH, McKhann GM, Goodman RR, Bateman LM, Emerson RG. Single unit action potentials in humans and the effect of seizure activity. *Brain* 2015; 138: 2891-2906.
- Mink JW, Blumenschine RJ, Adams DB. Ratio of central nervous system to body metabolism in vertebrates: its constancy and functional basis. *Am. J. Physiol. Regul. Integr. Comp. Physiol.* 1981; 241: R203-R212.
- Mohammadpour JD, Hosseinmardi N, Janahmadi M, Fathollahi Y, Motamedi F, Rohampour K. Non-selective NSAIDs improve the amyloid- $\beta$ -mediated suppression of memory and synaptic plasticity. *Pharmacol. Biochem. Behav.* 2015; 132: 33-41.
- Muldoon SF, Soltesz I, Cossart R. (2013). Spatially clustered neuronal assemblies comprise the microstructure of synchrony in chronically epileptic networks. *Proc. Natl. Acad. Sci. U.S.A.* 2013; 110: 3567-3572.
- Mumby DG, Gaskin S, Glenn MJ, Schramek TE, Lehmann H. Hippocampal damage and exploratory preferences in rats: memory for objects, places, and contexts. *Learn. Mem.* 2002; 9: 49-57.

- Neumann AR, Raedt R, Steenland HW, Sprengers M, Bzymek K, Navratilova Z et al. Involvement of fast-spiking cells in ictal sequences during spontaneous seizures in rats with chronic temporal lobe epilepsy. *Brain* 2017; 140: 2355-2369.
- O'Keefe J, Nadel L. The hippocampus as a cognitive map. *Oxford: Clarendon Press*, 1978.
- O'Keefe J, Recce ML. Phase relationship between hippocampal place units and the EEG theta rhythm. *Hippocampus* 1993; 3: 317-330.
- Papadelis C, Kourtidou-Papadeli C, Bamidis PD, Maglaveras N, Pappas K. The effect of hypobaric hypoxia on multichannel EEG signal complexity. *Clin. Neurophysiol.* 2007; 118: 31-52.
- Pietrobon D, Moskowitz MA. Chaos and commotion in the wake of cortical spreading depression and spreading depolarizations. *Nat. Rev. Neurosci.* 2014; 15: 379-393.
- Racine RJ. Modification of seizure activity by electrical stimulation: II. Motor seizure. *Electroencephalogr. Clin. Neurophysiol.* 1972; 32: 281-294.
- Ringach DL, Mineault PJ, Tring E, Olivas ND, Garcia-Junco-Clemente P, Trachtenberg JT. Spatial clustering of tuning in mouse primary visual cortex. *Nat. Commun.* 2016; 7: 12270.
- Rojas A, Chen D, Ganesh T, Varvel NH, Dingledine R. The COX-2/prostanoid signaling cascades in seizure disorders. Expert opinion on therapeutic targets. *Expert Opin. Ther. Targets* 2019; 23: 1-13.
- Rupprecht S, Schwab M, Fitzek C, Witte OW, Terborg C, Hagemann G. Hemispheric hypoperfusion in postictal paresis mimics early brain ischemia. *Epilepsy Res.* 2010; 89: 355-359.
- Sabolek HR, Swiercz WB, Lillis KP, Cash SS, Huberfeld G, Zhao G. A candidate mechanism underlying the variance of interictal spike propagation. *J. Neurosci.* 2012; 32: 3009-3021.
- Schevon, C. A., Weiss, S. A., McKhann Jr, G., Goodman, R. R., Yuste, R., Emerson, R. G., and Trevelyan, A. J. (2012). Evidence of an inhibitory restraint of seizure activity in humans. *Nat. Comm.* 3, 1060.
- Siwani S, França AS, Mikulovic S, Reis A, Hilscher MM, Edwards SJ. OLM $\alpha$ 2 cells bidirectionally modulate learning. *Neuron* 2018; 99: 404-412.
- Truccolo W, Donoghue JA, Hochberg LR, Eskandar EN, Madsen JR, Anderson WS et al. Single-neuron dynamics in human focal epilepsy. *Nat. Neurosci.* 2011; 14: 635-641.
- Skaggs WE, McNaughton BL, Wilson MA, Barnes CA. Theta phase precession in hippocampal neuronal populations and the compression of temporal sequences. *Hippocampus* 1996; 6: 149-172.
- So NK, Blume WT. The postictal EEG. *Epilepsy Behav.* 2010; 19: 121-126.
- Spanswick SC, Sutherland RJ. Object/context-specific memory deficits associated with loss of hippocampal granule cells after adrenalectomy in rats. *Learn. Mem.* 2010; 17: 241-245.
- Suh J, Rivest AJ, Nakashiba T, Tominaga T, Tonegawa S. Entorhinal cortex layer III input to the hippocampus is crucial for temporal association memory. *Science* 2011; 334: 1415-1420.
- Sutula T, Steward O. Quantitative analysis of synaptic potentiation during kindling of the perforant path. *J. Neurophysiol.* 1986; 56:732-746.

- Trimper JB, Stefanescu RA, Manns JR. Recognition memory and theta–gamma interactions in the hippocampus. *Hippocampus* 2014; 24: 341-353.
- Varga C, Oijala M, Lish J, Szabo GG, Bezaire M, Marchionni I et al. Functional fission of parvalbumin interneuron classes during fast network events. *Elife* 2014; 3: e04006.
- Vinogradova LV, Vinogradov VY, Kuznetsova GD. Unilateral cortical spreading depression is an early marker of audiogenic kindling in awake rats. *Epilepsy Res.* 2006; 71: 64-75.
- Weis MT, Malik KU. Regulation by calcium of arachidonic acid metabolism in the isolated perfused rabbit heart. *Circ. Res.* 1986; 59: 694-703.
- Wilson MA, McNaughton BL. Dynamics of the hippocampal ensemble code for space. *Science* 1993; 261: 1055-1058.
- Wilson RI, Nicoll RA. Endocannabinoid signaling in the brain. *Science* 2002; 296: 678-682.
- Wolansky T, Clement EA, Peters SR, Palczak MA, Dickson CT. Hippocampal slow oscillation: a novel EEG state and its coordination with ongoing neocortical activity. *J. Neurosci.* 2006; 26: 6213-6229.
- Yang H, Chen C. Cyclooxygenase-2 in synaptic signaling. *Curr. Pharm. Des.* 2008; 14: 1443-1451.
- Yang Y, Gao L. Celecoxib alleviates memory deficits by downregulation of COX-2 expression and upregulation of the BDNF-TrkB signaling pathway in a diabetic rat model. *J. Mol. Neurosci.* 2017; 62: 188-198.
- Zhao JP, Zhang R, Yu Q, Zhang JX. Characteristics of EEG activity during high altitude hypoxia and lowland reoxygenation. *Brain Res.* 2016; 1648: 243-249.
